# Supplementary material for: Improving subtropical boundary layer cloudiness in the 2011 NCEP GFS
Source: Copernicus journal article supplement (doi:10.5194/gmd-7-2107-2014), 2014-09-23
Supplement: Supplementary file 1 [file gmd-7-2107-2014-supplement.zip]

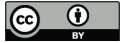

## *Supplement of*

# **Improving subtropical boundary layer cloudiness in the 2011 NCEP GFS**

**J. K. Fletcher et al.**

*Correspondence to:* J. K. Fletcher ([jennifer.fletcher@monash.edu](mailto:jennifer.fletcher@monash.edu))

- Supplement-Cover-Letter.pdf
- README.pdf
- \_\_MACOSX
  - .\_moninq1\_v.f
  - .\_shalcnv\_v.f.v2011
  - .\_shalcnv\_v.f.vvel
- moninq1\_v.f
- shalcnv\_v.f.v2011
- shalcnv\_v.f.vvel
