# Supplementary material for: Improving subtropical boundary layer cloudiness in the 2011 NCEP GFS
Source: Copernicus journal article supplement (doi:10.5194/gmd-7-2107-2014), 2014-09-23
Supplement: Supplementary file 2 [file gmd-7-2107-2014-supplement.zip]

The following supplementary materials are included:

moninq\_v.f: the GFS PBL scheme for the SCM, with modifications as options

shalcnv\_v.f.v2011: the shallow convection scheme for the SCM, with modifications as options

shalcnv\_v.f.vvel: the shallow convection scheme that uses the vertical velocity equation to predict cloud top, which includes other modifications as options.
